# Supplementary material
Source: PubMed Central journal article supplement (PMC4187091)
Supplement: ACI-05-0746-s001.pdf [file ACI-05-0746-s001.pdf]

**Appendix Table 1. Opportunities to Intervene (n=47)**

| Category (n)            | Sub-Type                                          | Cases | Total Indemnity, \$ |
|-------------------------|---------------------------------------------------|-------|---------------------|
| Communication (5)       | - Miscommunication on phone                       | 13    | 5,186,247           |
|                         | - Staff-Family                                    |       |                     |
|                         | - Staff-Patient                                   |       |                     |
|                         | - Staff-Staff                                     |       |                     |
|                         | - Staff-Staff Handoff                             |       |                     |
| Consent (3)             | - Consent                                         | 15    | 6,559,981.88        |
|                         | - Behave consistent with patient consent          |       |                     |
|                         | - Obtain and document consent                     |       |                     |
| Diagnosis (1)           | - Diagnose correctly                              | 23    | 11,800,000          |
| Documentation (6)       | - Document accurately                             | 31    | 5,723,400           |
|                         | - Document all encounters                         |       |                     |
|                         | - Document comprehensively                        |       |                     |
|                         | - Timely documentation                            |       |                     |
|                         | - Truthful documentation                          |       |                     |
|                         | - Prevent pre-documentation                       |       |                     |
| Medication (6)          | - Avoid contraindicated medications               | 24    | 7,457,534           |
|                         | - Give correct medication                         |       |                     |
|                         | - Give patient information at time of prescribing |       |                     |
|                         | - Medication tracking                             |       |                     |
|                         | - Prepare medications correctly                   |       |                     |
|                         | - Retrieve unneeded medications from the floor    |       |                     |
| Monitor Lab Results (1) | - Check results during medication therapy         | 1     | 0                   |
| Ordering (3)            | - Consistent with guardianship order              | 6     | 4,320,000           |
|                         | - Avoid performing unordered tests                |       |                     |
|                         | - Order the right test                            |       |                     |
| Patient Care (5)        | - Fall prevention                                 | 42    | 13,787,356.02       |
|                         | - Patient monitoring                              |       |                     |
|                         | - Provide care within scope of practice           |       |                     |
|                         | - Supervision                                     |       |                     |
|                         | - Provide timely care                             |       |                     |
| Procedure (4)           | - Avoid leaving foreign body in patient           | 69    | 19,076,848.21       |
|                         | - Perform indicated procedure                     |       |                     |
|                         | - Perform procedure correctly                     |       |                     |
|                         | - Perform procedure in appropriate setting        |       |                     |
| Radiology (2)           | - Interpret film comprehensively                  | 4     | 1,100,322.82        |
|                         | - Interpret film correctly                        |       |                     |
| Referral Management (3) | - Failure to refer                                | 13    | 7,122,891.72        |
|                         | - Recommendations not followed                    |       |                     |
|                         | - Staff-staff communication                       |       |                     |
| Results Management (7)  | - Recommendations not followed                    | 27    | 10,763,232.66       |
|                         | - Repeat abnormal tests                           |       |                     |
|                         | - Specimen handling                               |       |                     |
|                         | - Staff-staff communication                       |       |                     |
|                         | - Test ordered, not performed                     |       |                     |
|                         | - Test performed, not followed up on              |       |                     |
|                         | - Transcribe correctly                            |       |                     |
| Screening (1)           | - Health maintenance                              | 4     | 2,300,000           |
